# Supplementary material for: Diastereoselective synthesis of (±)-trichodiene and (±)-trichodiene-D3as analytical standards for the on-site quantification of trichothecenes
Source: Royal Society of Chemistry journal article supplement (doi:10.1039/d1ob01778k), 2021-01-01
Supplement: d1ob01778k1.pdf [file d1ob01778k1.pdf]

# Diastereoselective synthesis of ( $\pm$ )-trichodiene and ( $\pm$ )-trichodiene-D<sub>3</sub> as analytical standards for the on-site quantification of trichothecenes

Michael A. Sebald <sup>a\*</sup>, Julian Gebauer <sup>b</sup>, Matthias Koch <sup>c</sup>

<sup>a</sup> HPC Standards GmbH, Am Wieseneck 7, D-04451 Cunnersdorf, Germany

<sup>b</sup> AnalytiCon Discovery GmbH, Hermannswerder Haus 17, D-14473 Potsdam, Germany

<sup>c</sup> Bundesanstalt für Materialforschung und -prüfung, Abteilung Analytische Chemie, Referenz-materialien, Richard-Willstätter-Strasse 11, D-12489 Berlin-Adlershof, Germany

\* Correspondence: sebald@hpc-standards.com; phone: +49 34291 3372 36

## Content

|                                                                                 |           |
|---------------------------------------------------------------------------------|-----------|
| <b>1. Materials and methods</b> .....                                           | <b>2</b>  |
| <b>2. Analytical Data</b> .....                                                 | <b>3</b>  |
| <sup>1</sup> H- and <sup>13</sup> C-NMR spectra of all isolated compounds ..... | 3         |
| GC-EI-MS Analysis of TD-D <sub>3</sub> <b>3a</b> and TD <b>3b</b> .....         | 13        |
| Diastereomeric ratio of TD-D <sub>3</sub> <b>3a</b> and TD <b>3b</b> .....      | 14        |
| <b>3. References</b> .....                                                      | <b>15</b> |

## 1. MATERIALS AND METHODS

**General Methods and Instruments.** NMR spectra were either recorded on a Varian Mercury Plus 300 (300.8 MHz), Varian Mercury Plus 400 (399.95 MHz), or a Bruker Avance III HD (400.13 MHz) spectrometer (Varian/Agilent Technologies Inc., Santa Clara, CA, USA; Bruker Corp., Billerica, MA, USA). All signals were referenced to the respective solvent signals reported in the literature<sup>1</sup>. All coupling constants *J* refer to hydrogen–hydrogen interactions unless stated otherwise. The final products (±)-TD-D<sub>3</sub> **3a** and (±)-TD **3b** were analyzed using an Agilent Technologies 6890N Network GC System connected to an Agilent Technologies 5973N Network Mass Selective Detector (Agilent Technologies Inc., Santa Clara, CA, USA). Separation was performed with a SGE Analytical Science column (50 m x 0.22 mm, ID BPX5 x 0.25 μm, Trajan Scientific, Ridgewood, Victoria, Australia). The diastereomeric ratio of the final products was determined by comparison of the integrals of the vinylic protons of the endocyclic double bond.

## 2. ANALYTICAL DATA

### $^1\text{H}$ - and $^{13}\text{C}$ -NMR spectra of all isolated compounds

#### (2-methylcyclopent-1-en-1-yl) methanol (7)

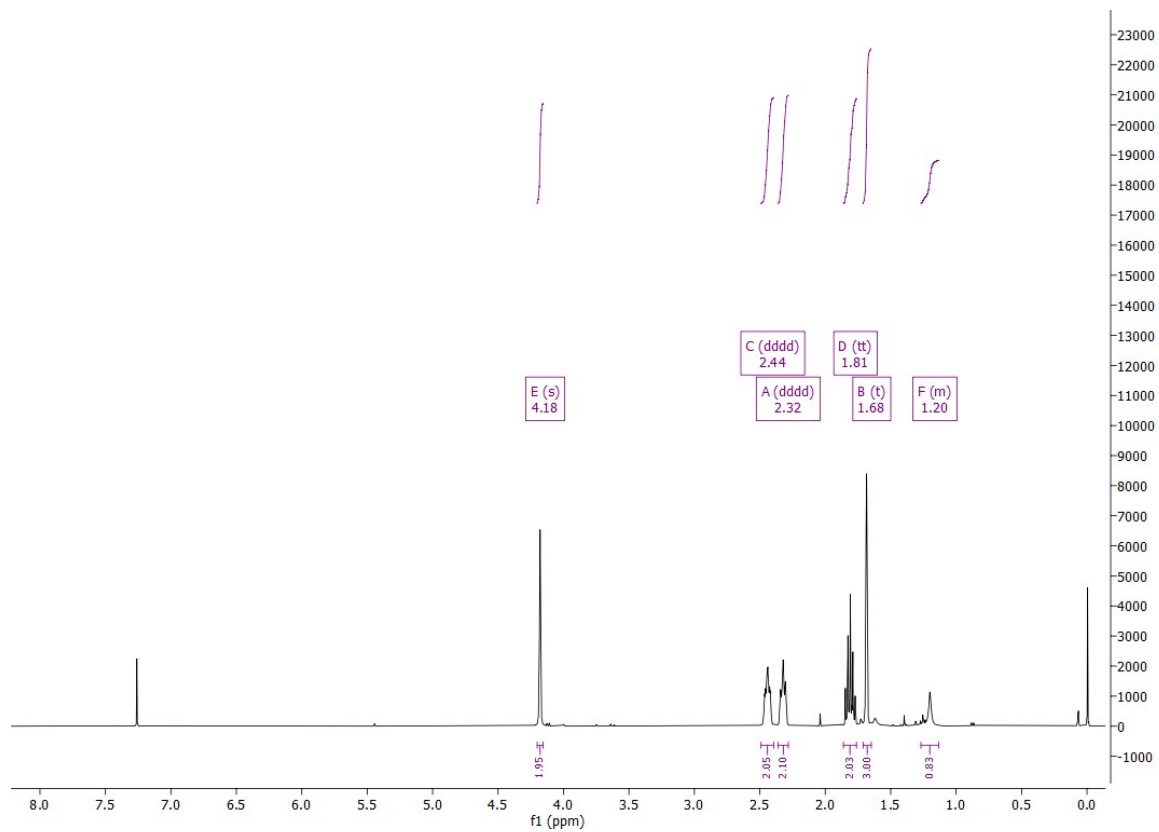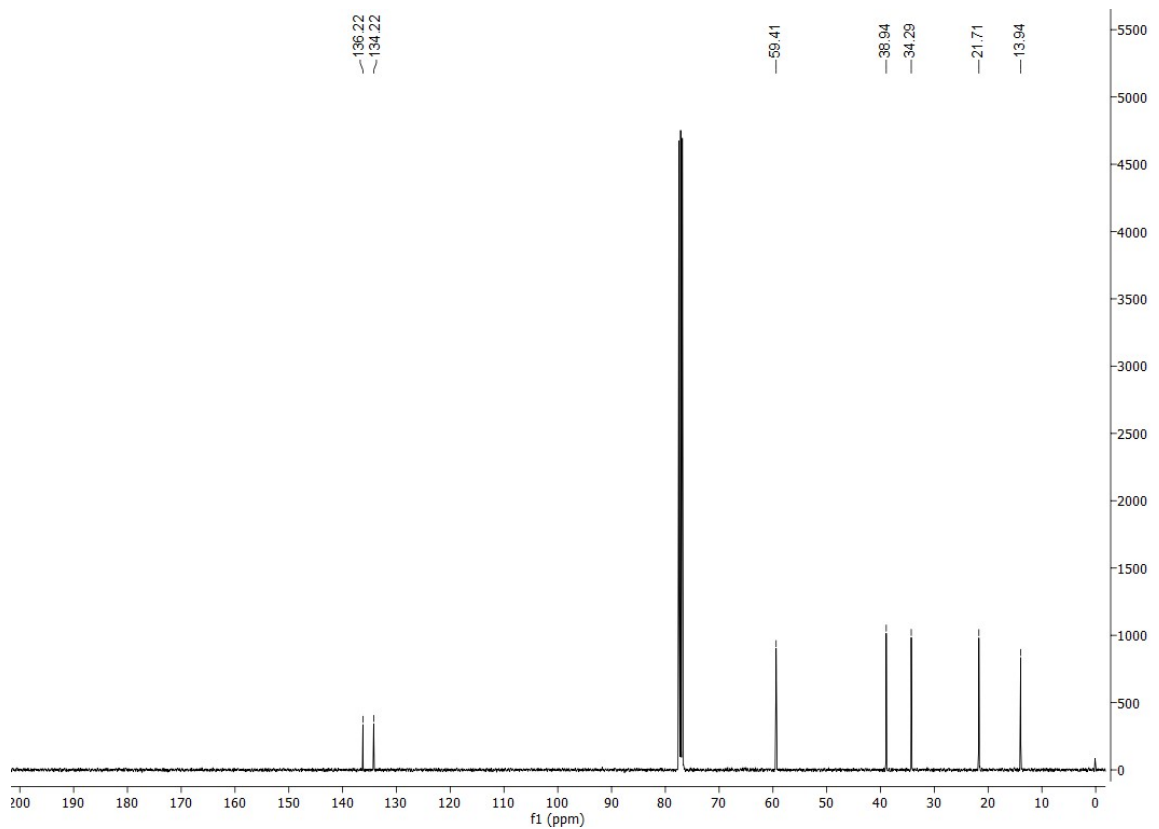

ethyl 2-(1-methyl-2-methylenecyclopentyl) propanoate (5)

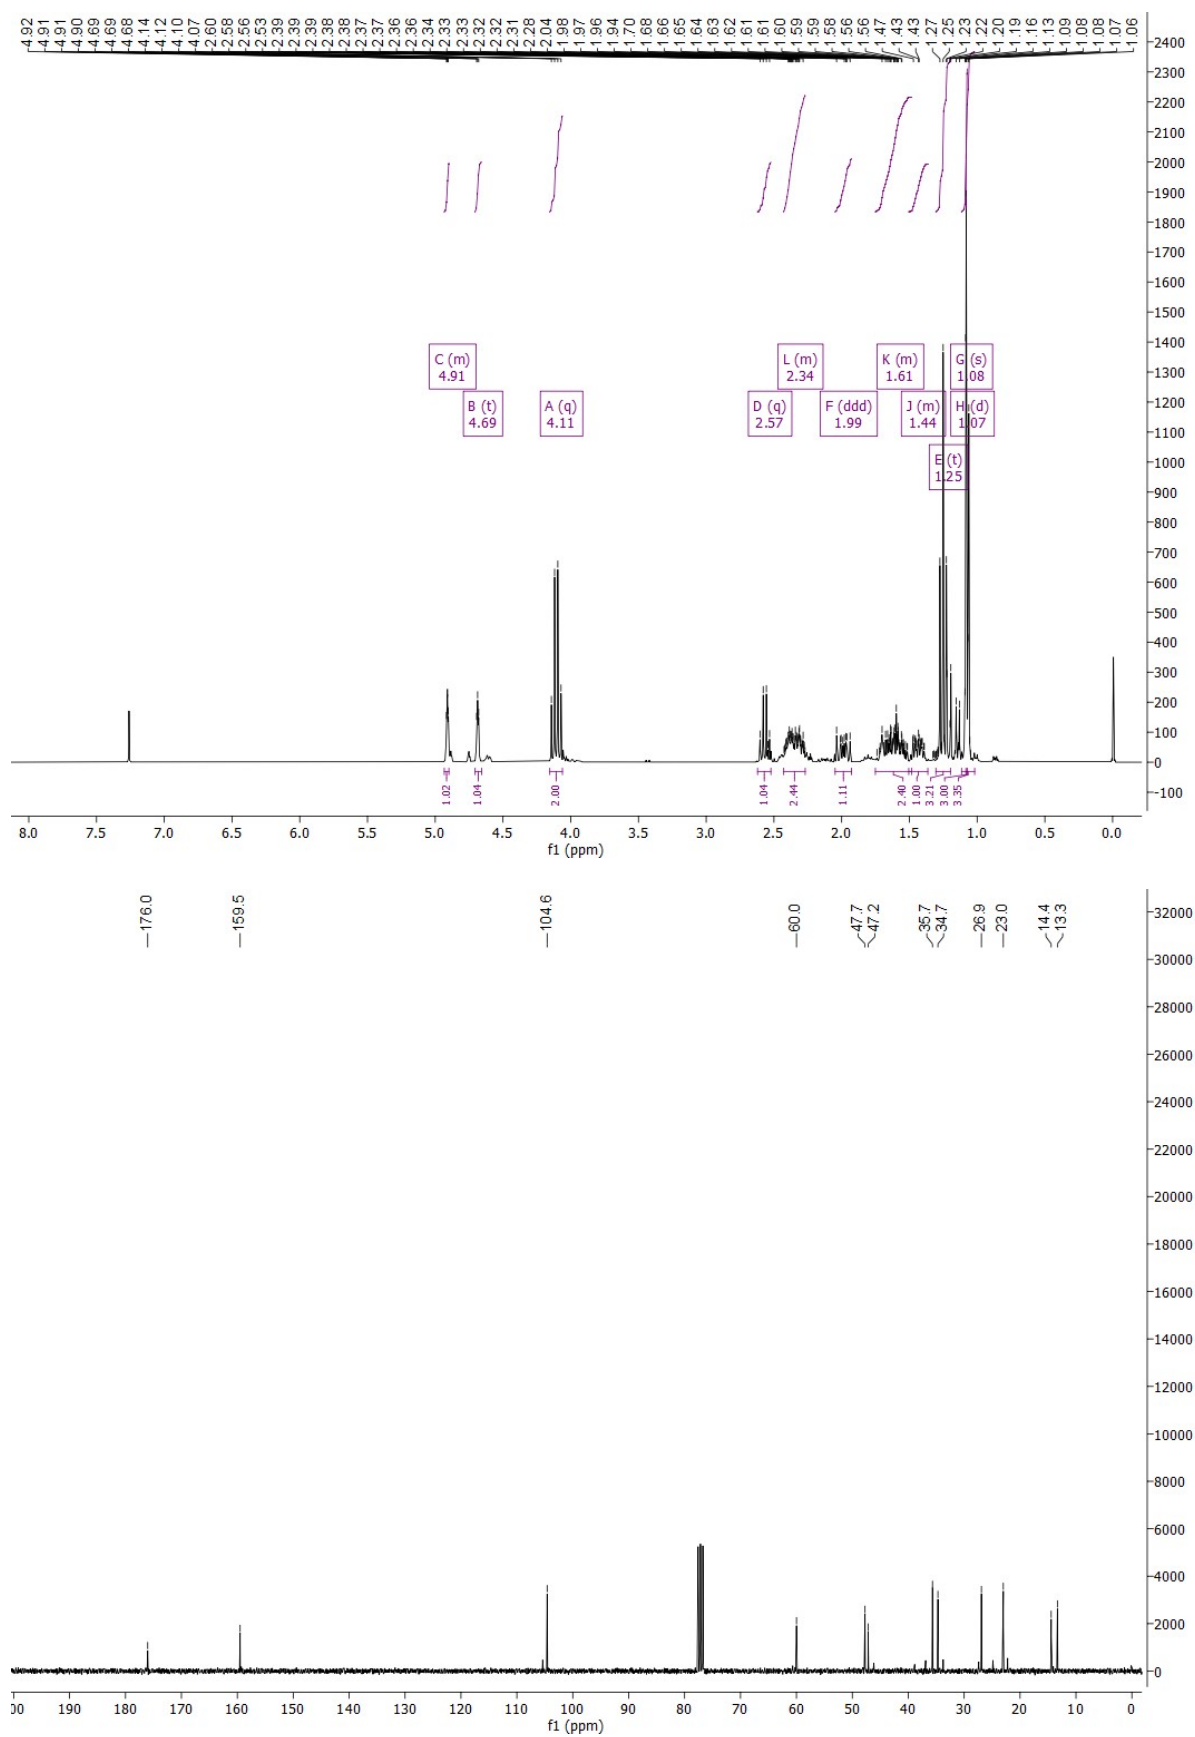

2-methyl-2-(1-methyl-2-methylenecyclopentyl) pent-4-enal-3,3,4,5,5-d<sub>5</sub> (**8a**)

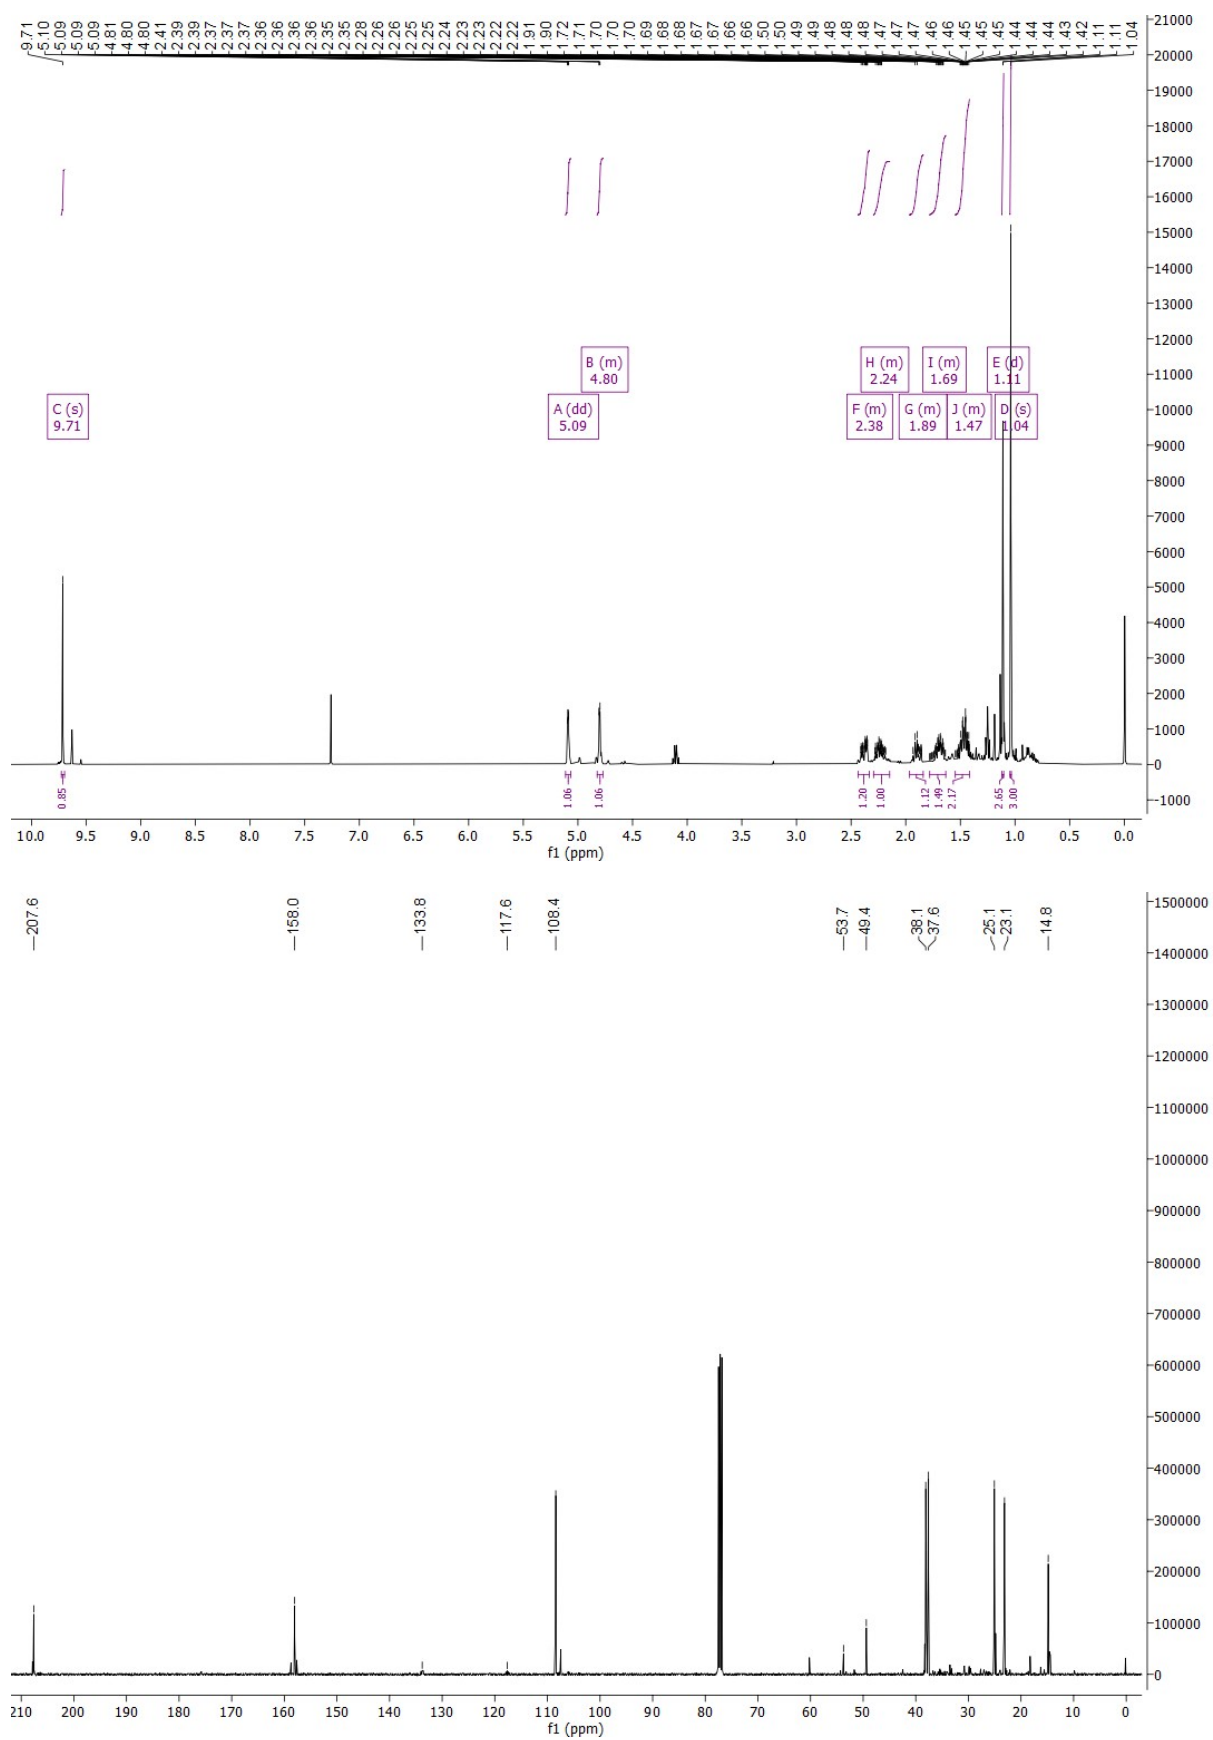

2-methyl-2-(1-methyl-2-methylenecyclopentyl) pent-4-enal (**8b**)

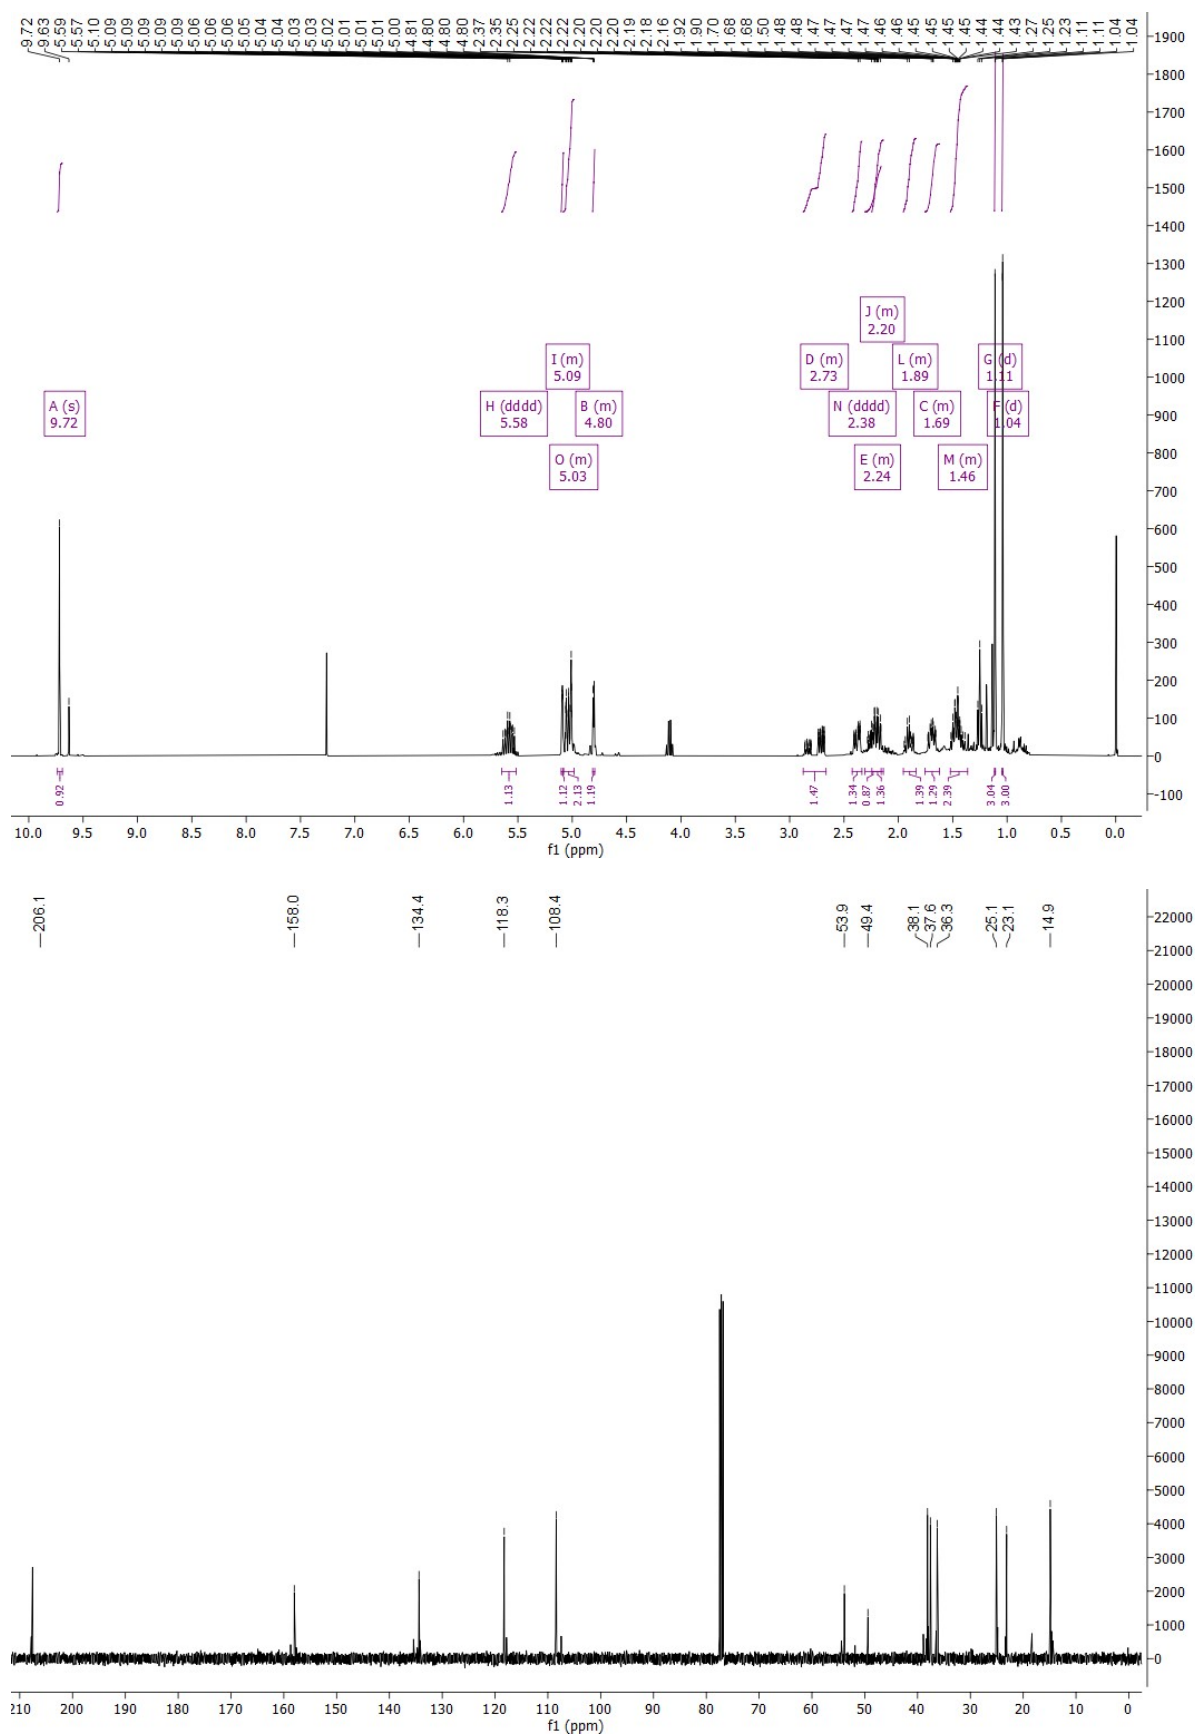

4-methyl-4-(1-methyl-2-methylenecyclopentyl) hept-6-enitrile-5,5,6,7,7-d<sub>5</sub> (9a)

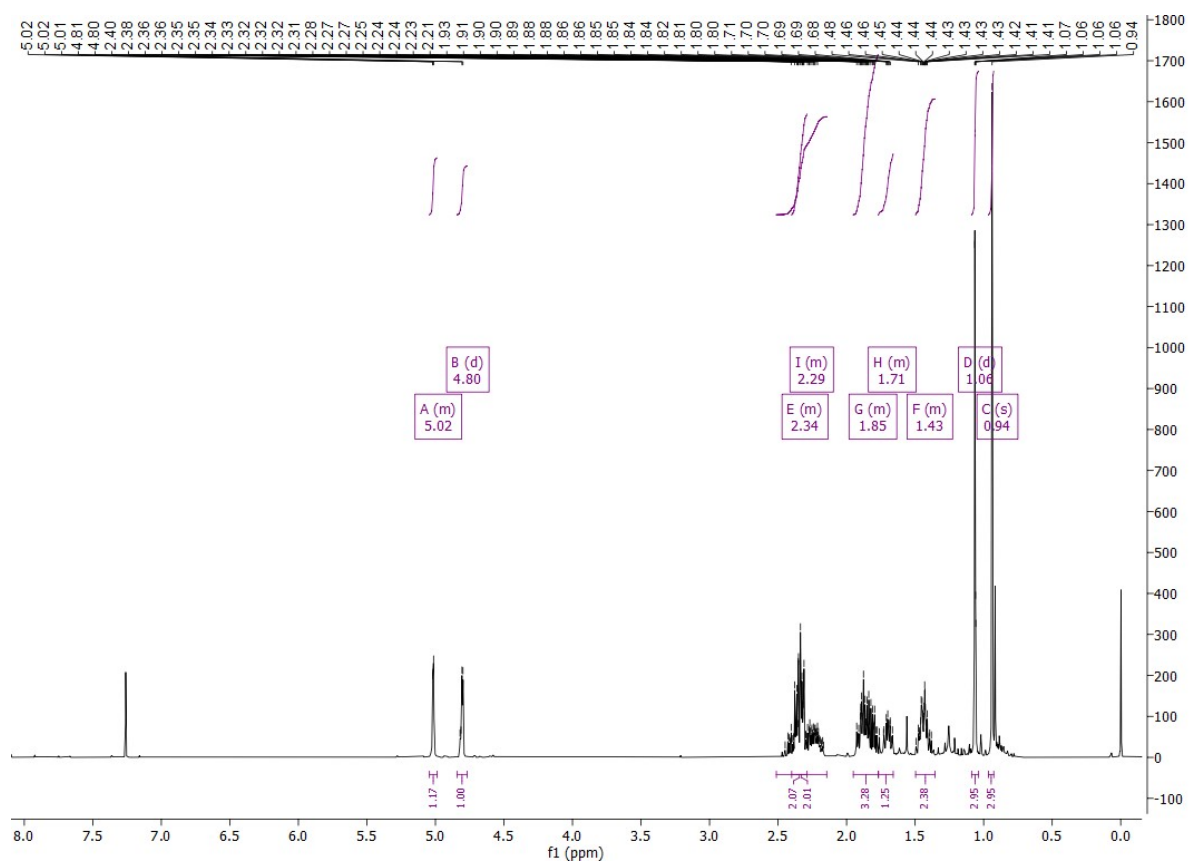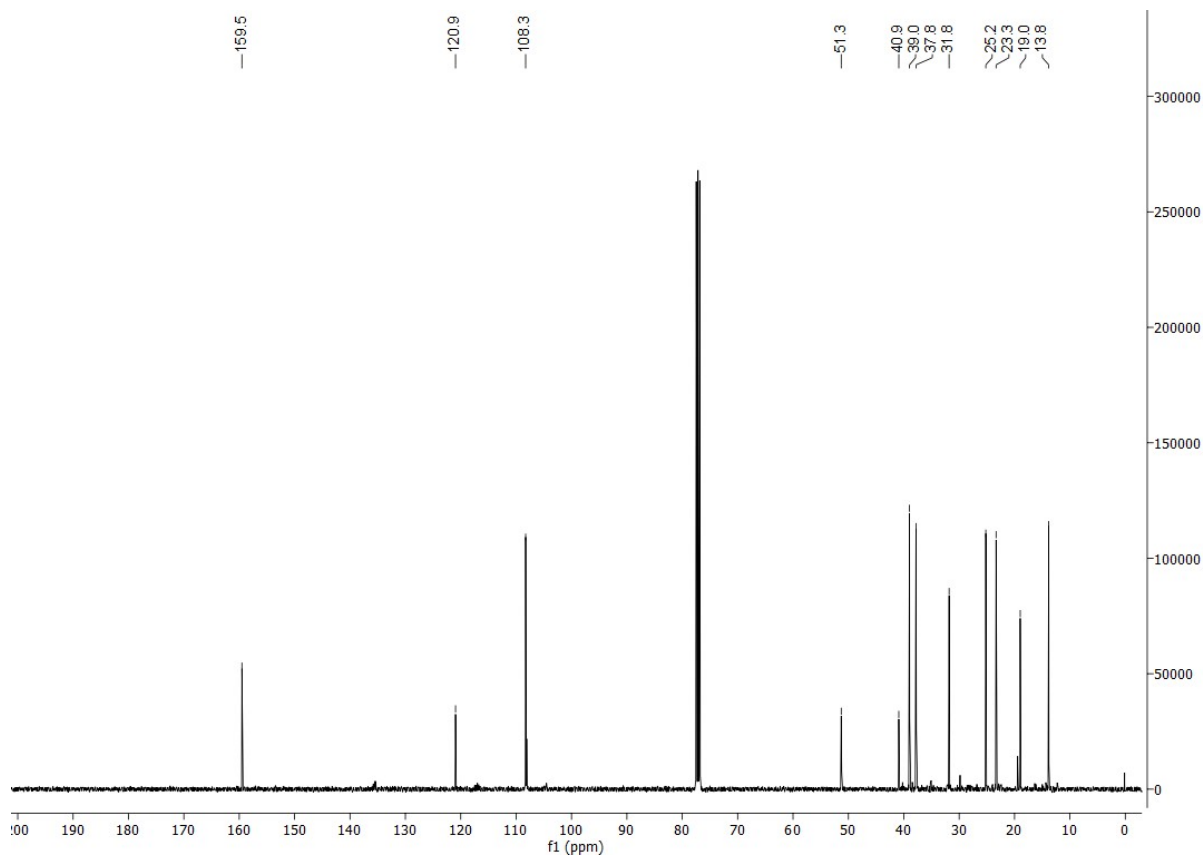

4-methyl-4-(1-methyl-2-methylenecyclopentyl) hept-6-enitrile (**9b**)

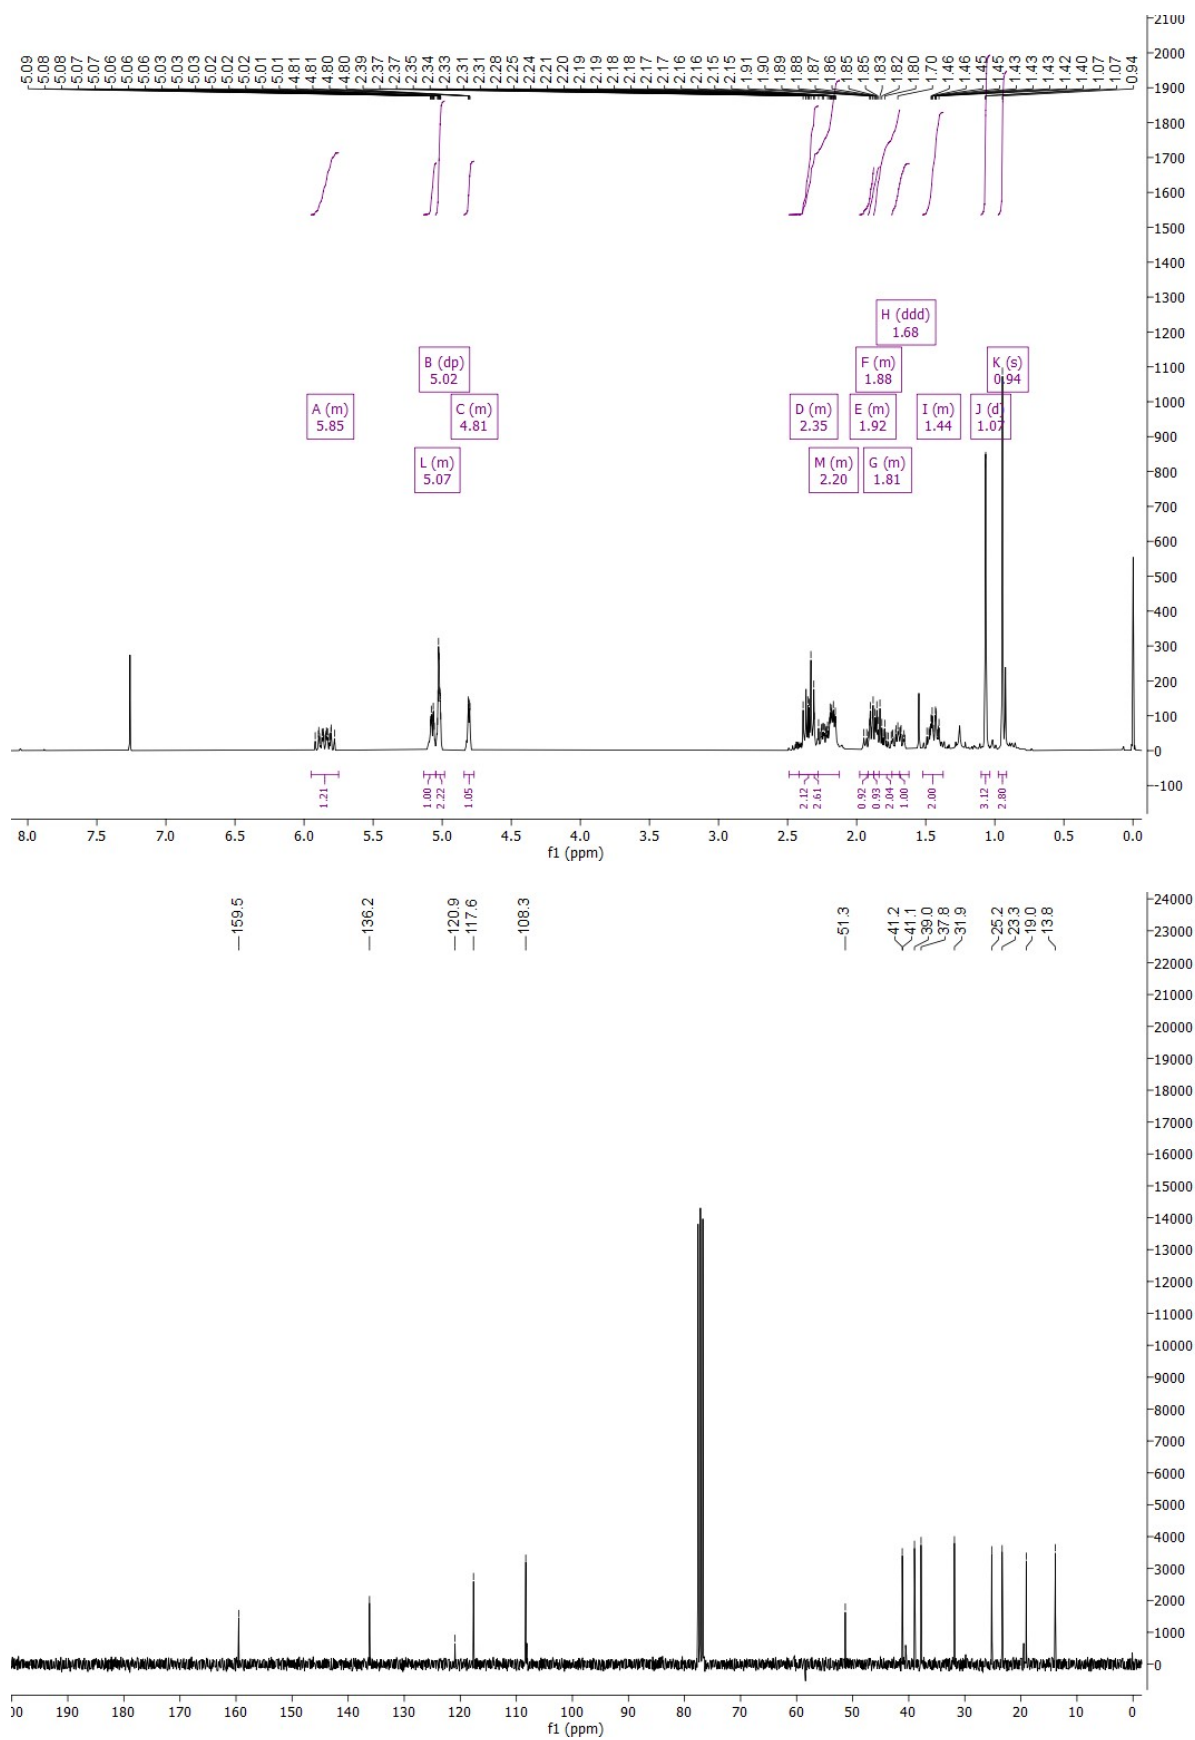



5-methyl-5-(1-methyl-2-methylenecyclopentyl) oct-7-en-2-one-6,6,7,8-d<sub>5</sub> (**4a**)

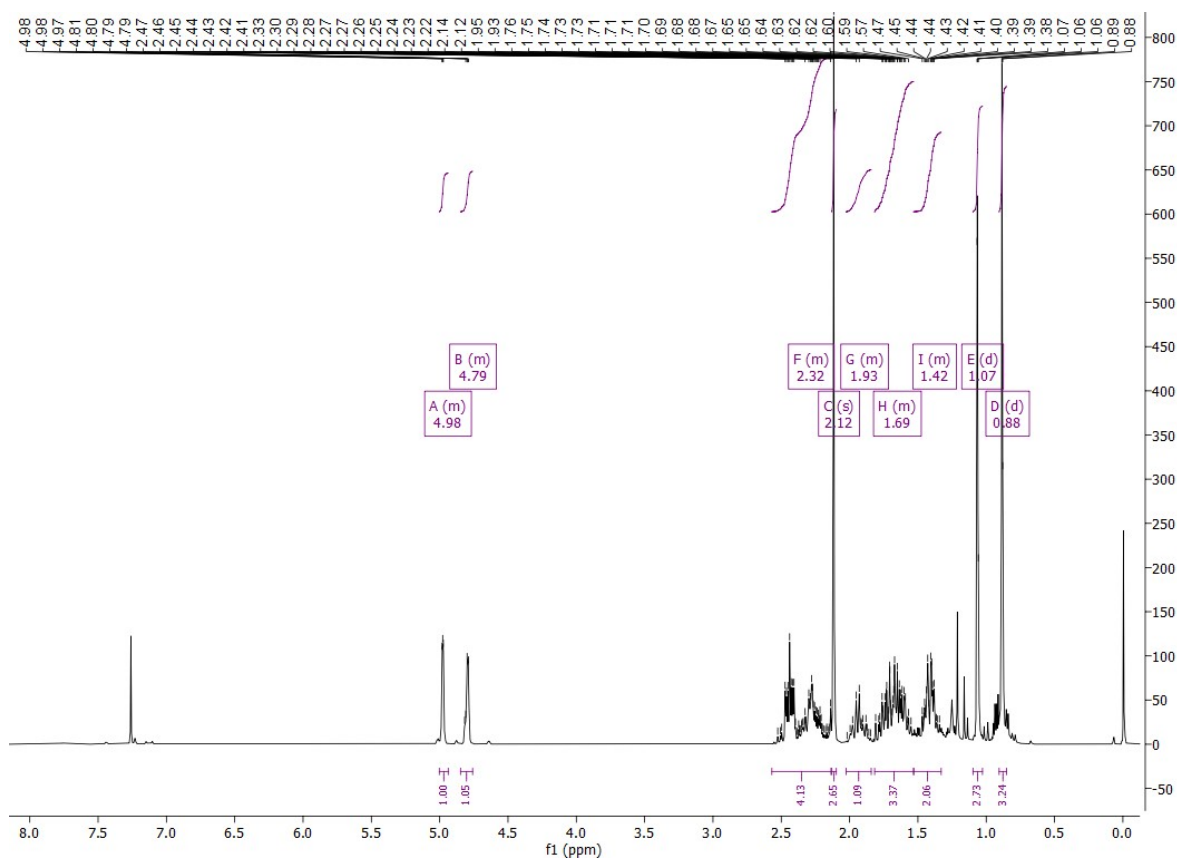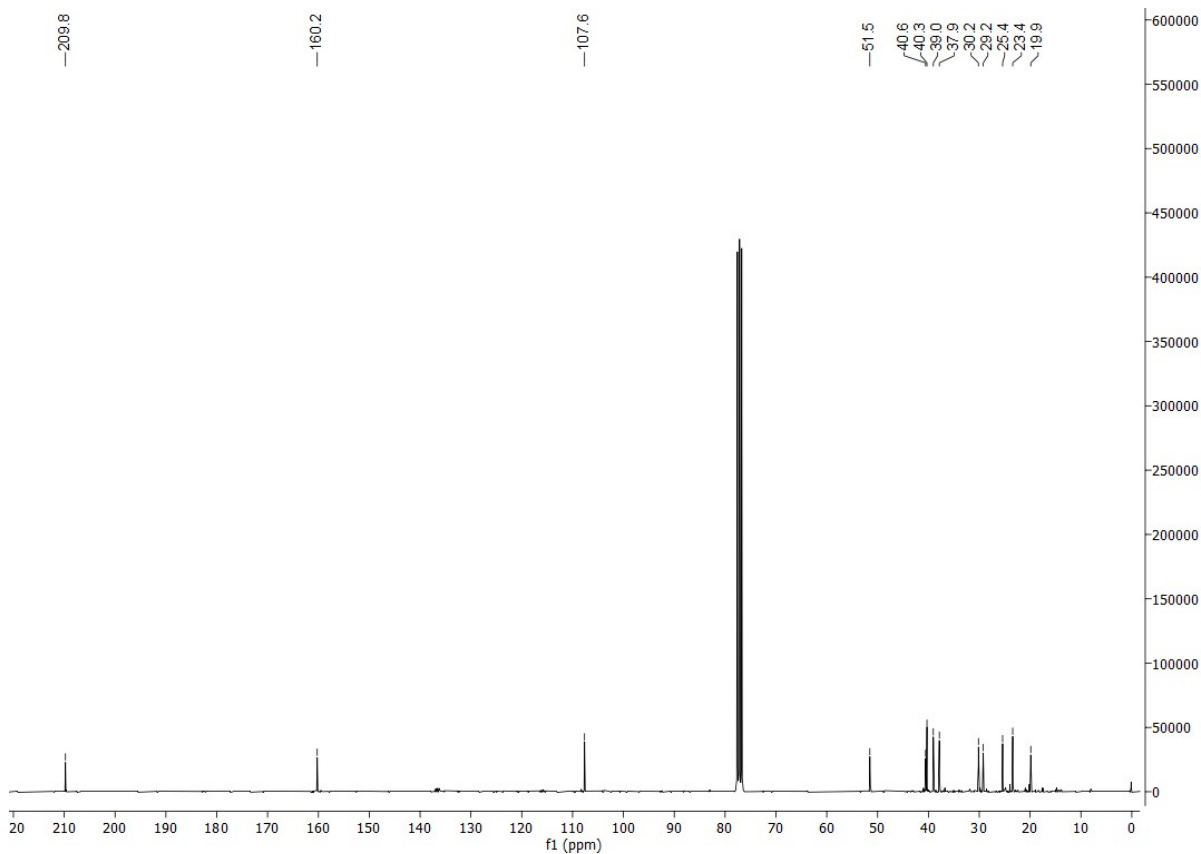

5-methyl-5-(1-methyl-2-methylenecyclopentyl) oct-7-en-2-one (**4b**)

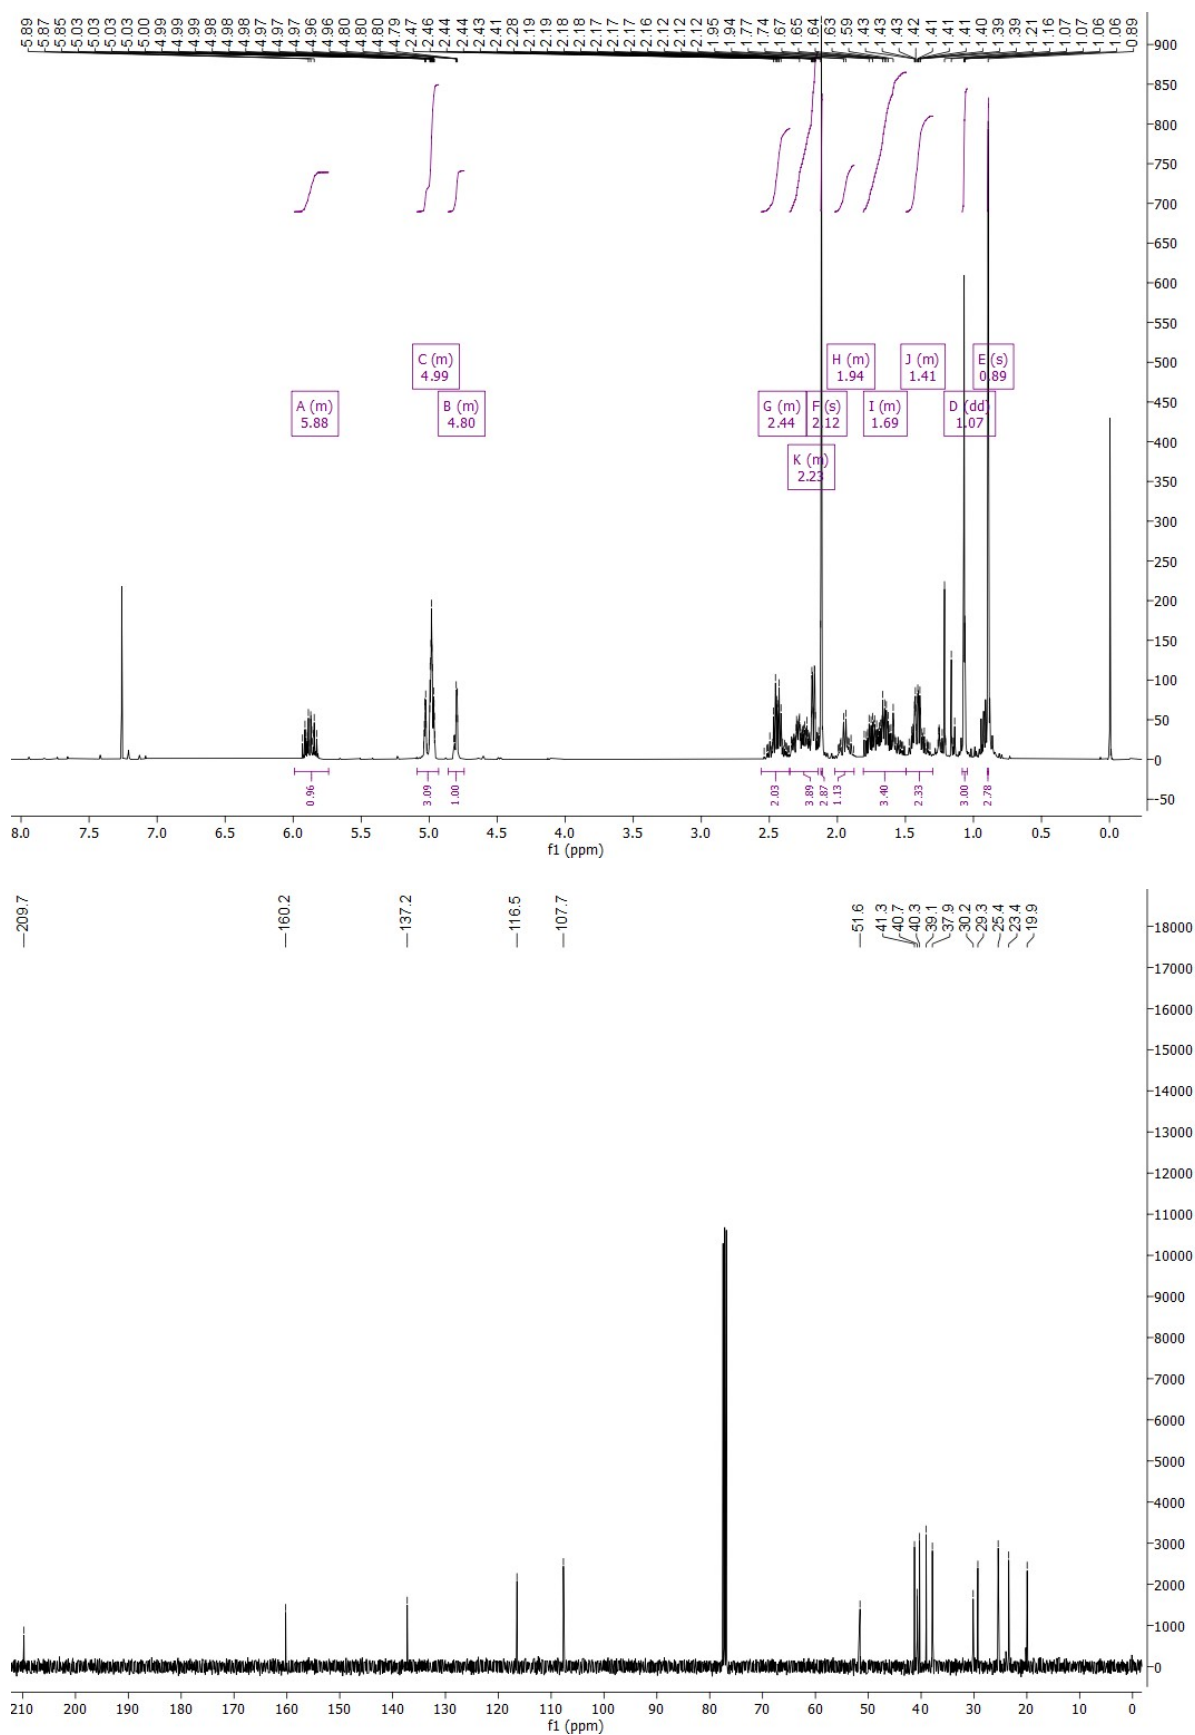



**1,4-dimethyl-4-(1-methyl-2-methylenecyclopentyl) cyclohex-1-ene ((±)-trichodien **3b**)**

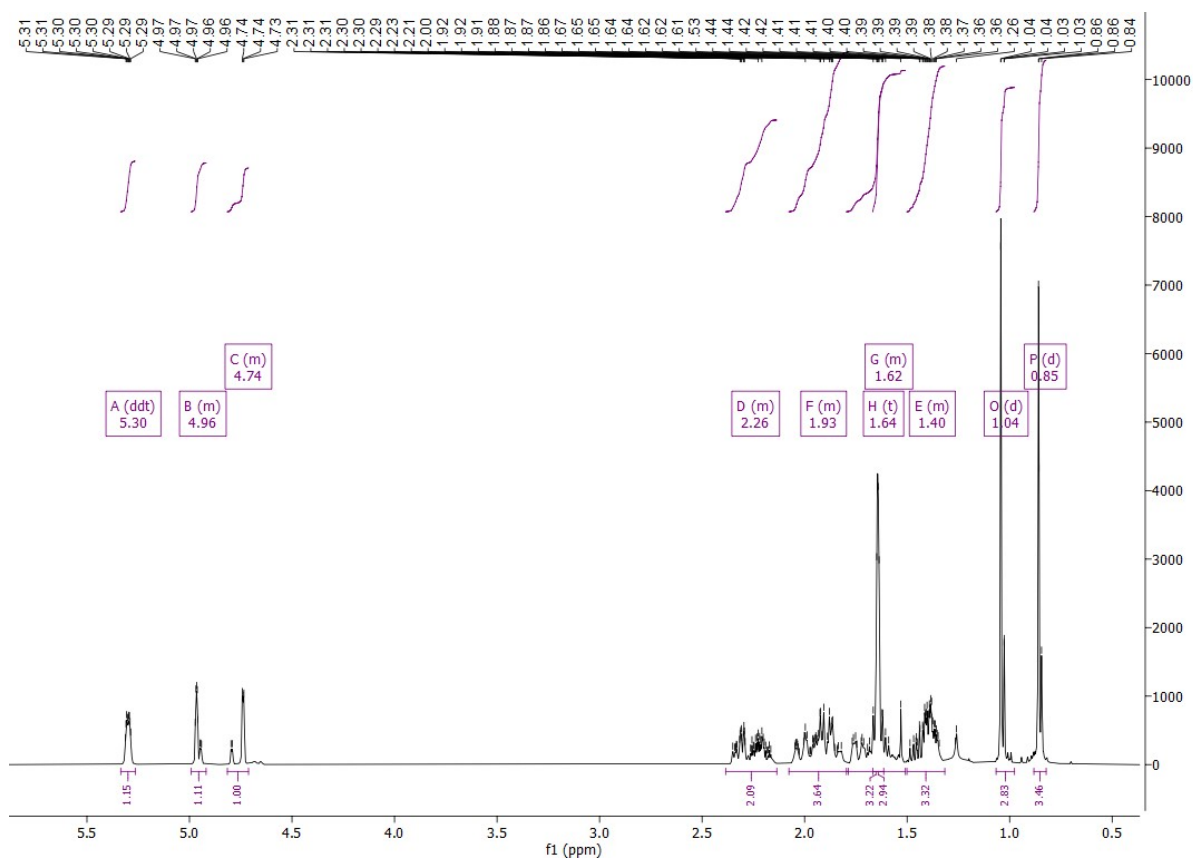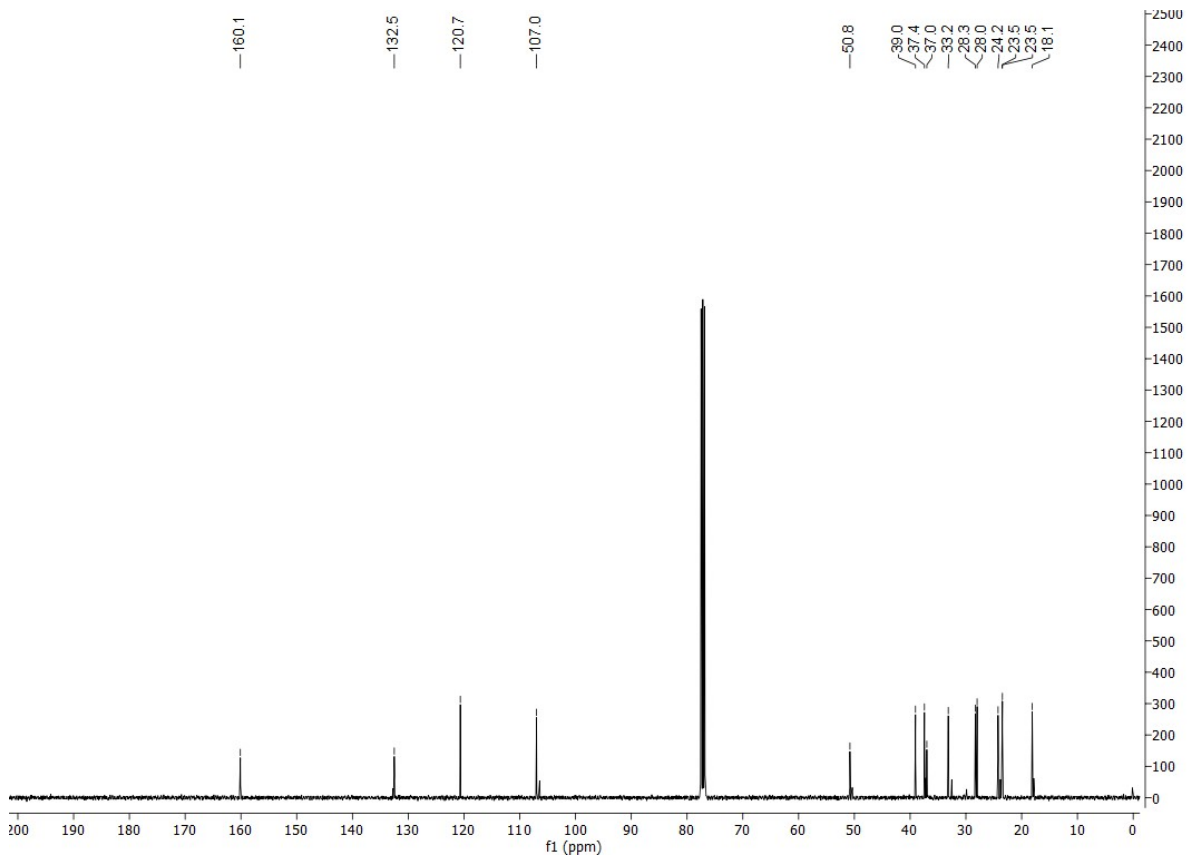

## GC-EI-MS Analysis of TD-D<sub>3</sub> 3a and TD 3b

### 1,4-dimethyl-4-(1-methyl-2-methylenecyclopentyl) cyclohex-1-ene-2,3,3-d<sub>3</sub> ((±)-trichodiene-D<sub>3</sub> **3a**)

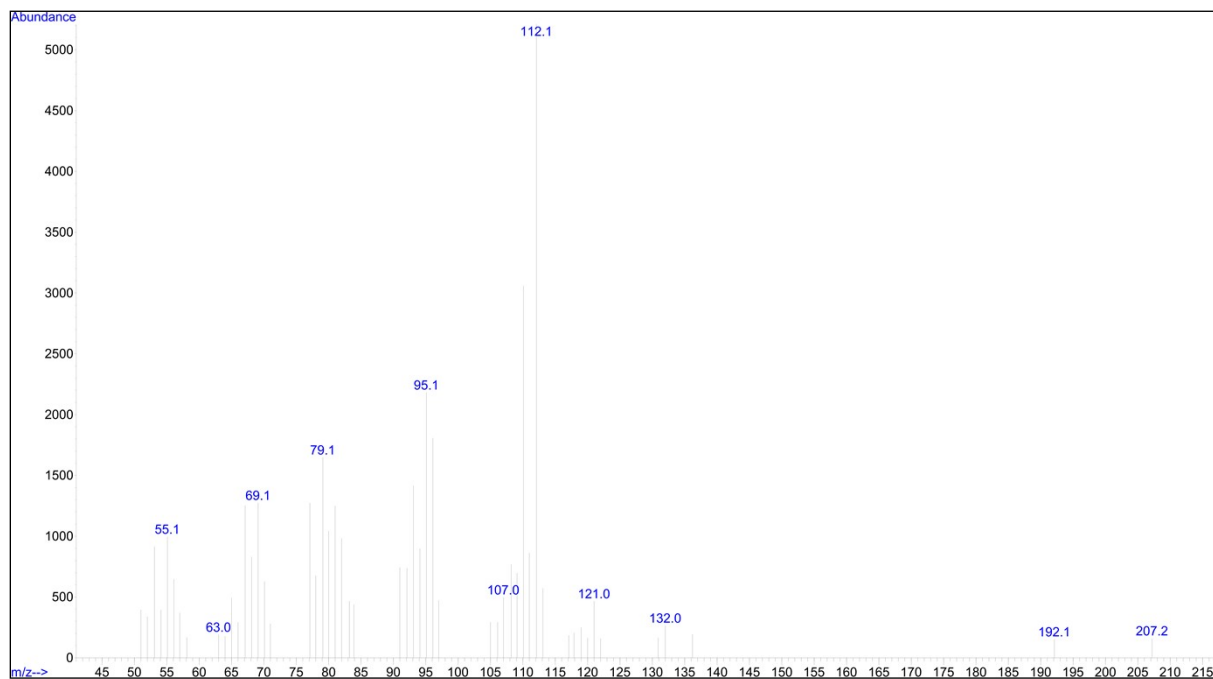

### 1,4-dimethyl-4-(1-methyl-2-methylenecyclopentyl) cyclohex-1-ene ((±)-trichodiene **3b**)

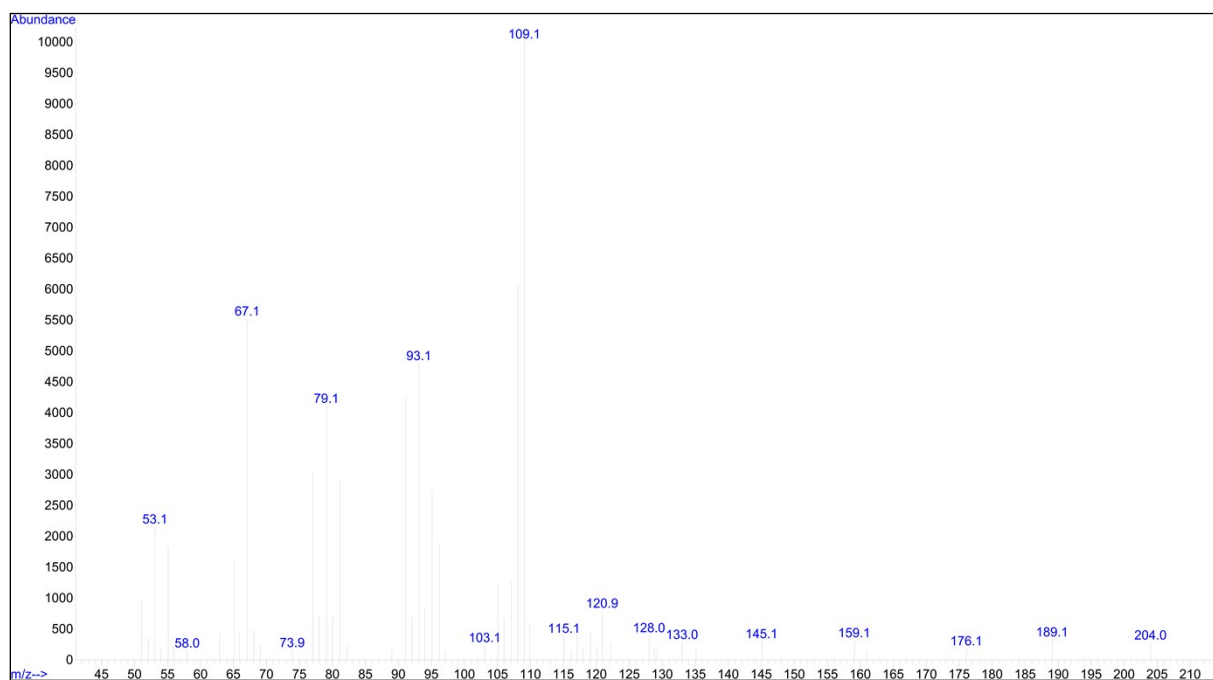

## Diastereomeric ratio of TD-D<sub>3</sub> **3a** and TD **3b**

### 1,4-dimethyl-4-(1-methyl-2-methylenecyclopentyl) cyclohex-1-ene-2,3,3-d<sub>3</sub> ((±)-trichodiene-D<sub>3</sub> **3a**)

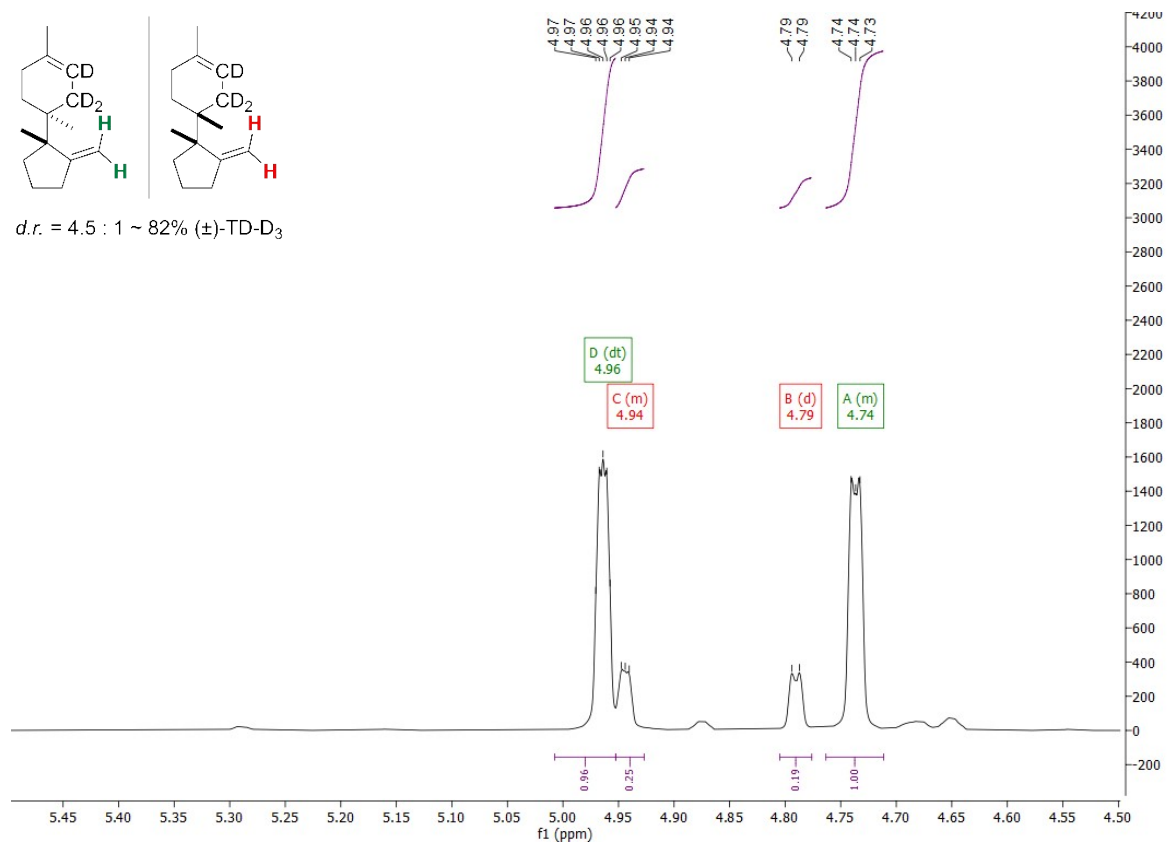

### 1,4-dimethyl-4-(1-methyl-2-methylenecyclopentyl) cyclohex-1-ene ((±)-trichodiene **3b**)

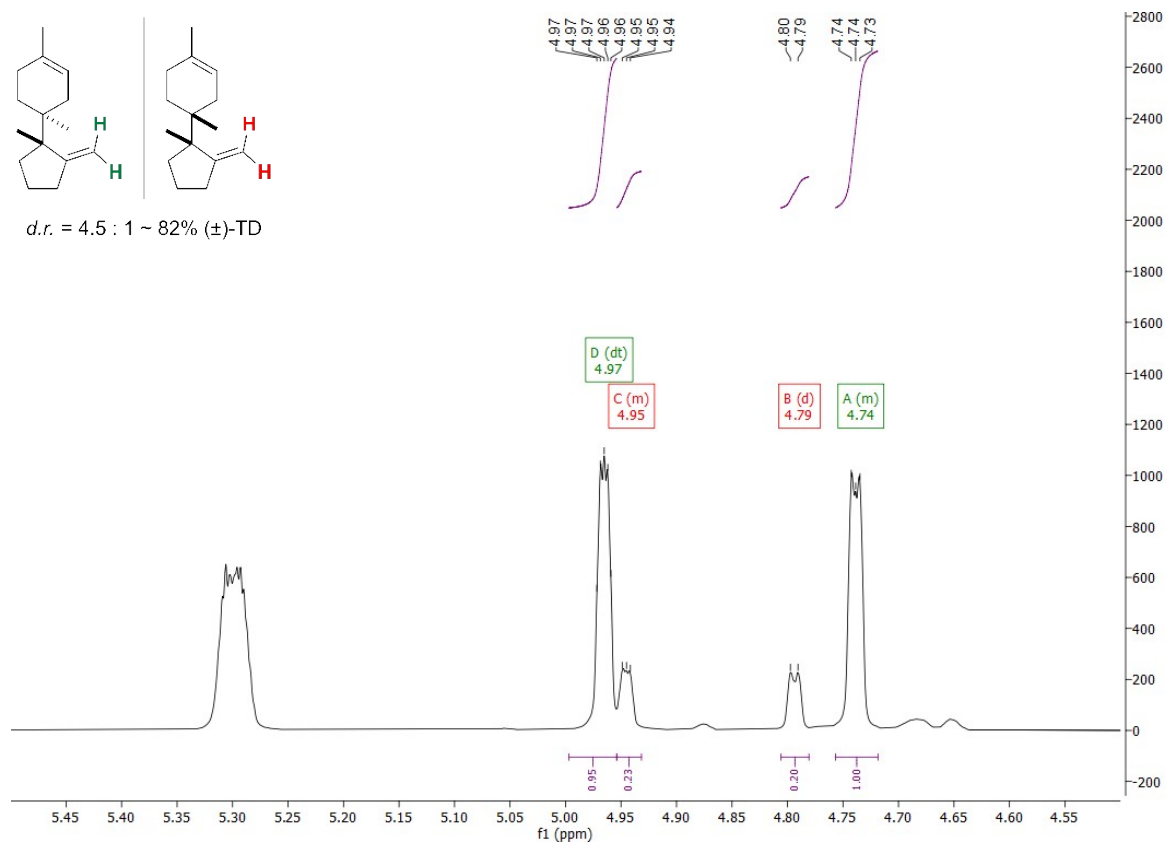

### 3. REFERENCES

- 1 N. R. Babij, E. O. McCusker, G. T. Whiteker, B. Canturk, N. Choy, L. C. Creemer, C. V. D. Amicis, N. M. Hewlett, P. L. Johnson, J. A. Knobelsdorf, F. Li, B. A. Lorsbach, B. M. Nugent, S. J. Ryan, M. R. Smith and Q. Yang, *Org. Process Res. Dev.*, **2016**, *20*, 661–667.
